# Supplementary material for: Three-dimensional structure of 22 uncultured ssRNA bacteriophages: Flexibility of the coat protein fold and variations in particle shapes
Source: PubMed Central journal article supplement — Sci Adv. 2020 Sep 2;6(36):eabc0023. doi: 10.1126/sciadv.abc0023 (PMC7467689; doi:10.1126/sciadv.abc0023), 2020-09-02
Supplement: abc0023_SM.pdf [file abc0023_SM.pdf]

## Supplementary Materials for

### **Three-dimensional structure of 22 uncultured ssRNA bacteriophages: Flexibility of the coat protein fold and variations in particle shapes**

Jānis Rūmnieks, Ilva Liekniņa, Gints Kalniņš, Mihails Šišovs, Ināra Akopjana, Jānis Bogans, Kaspars Tārs\*

\*Corresponding author. Email: [kaspars@biomed.lu.lv](mailto:kaspars@biomed.lu.lv)

Published 2 September 2020, *Sci. Adv.* **6**, eabc0023 (2020)

DOI: [10.1126/sciadv.abc0023](https://doi.org/10.1126/sciadv.abc0023)

#### **This PDF file includes:**

Figs. S1 to S5  
Tables S1 and S2  
References

**A**

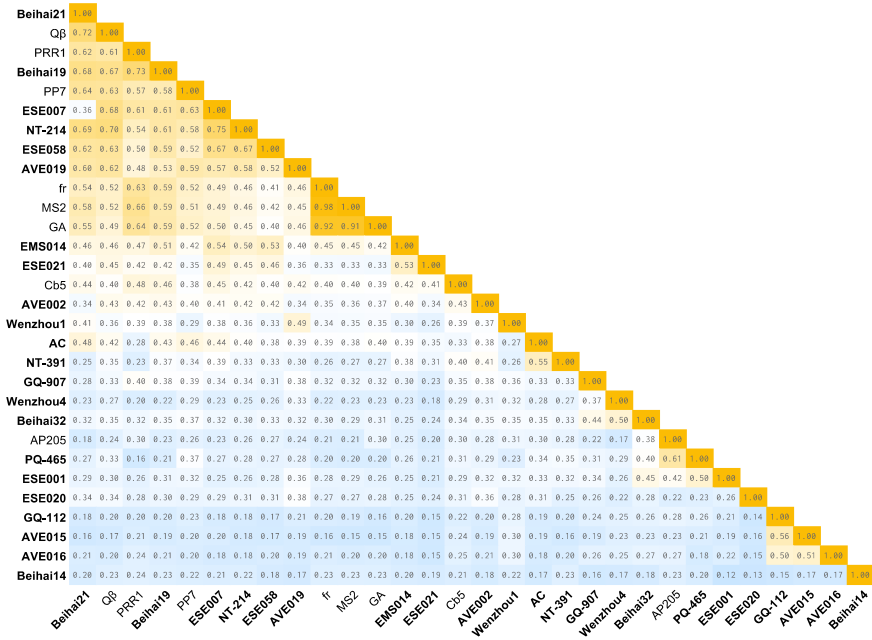

**B**

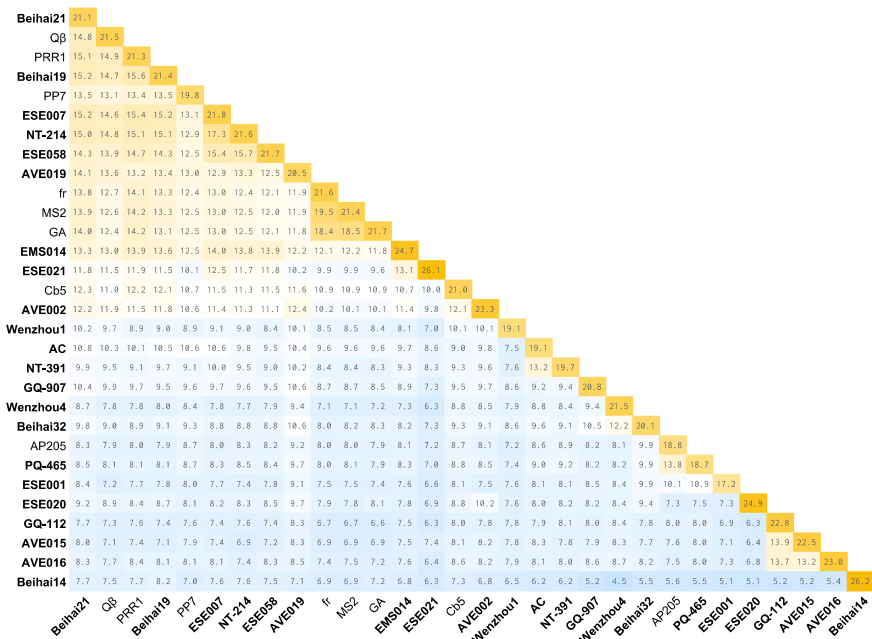

**Figure S1. Structural similarity of ssRNA bacteriophage coat proteins. (A)** Similarity analysis based on pairwise secondary structure matching using the program SUPERPOSE (49). The numerical values in the table represent the quality (Q) scores for each respective pairwise superposition. **(B)** All-against-all similarity analysis using the DALI server (50). The numerical values in the table correspond to the Z-scores for each pair. For both analyses the same dataset of quasi-equivalent C monomer coordinates from all currently available ssRNA phage structures was used. CP clustering was done manually. The CPs originating from the current study are shown in bold.



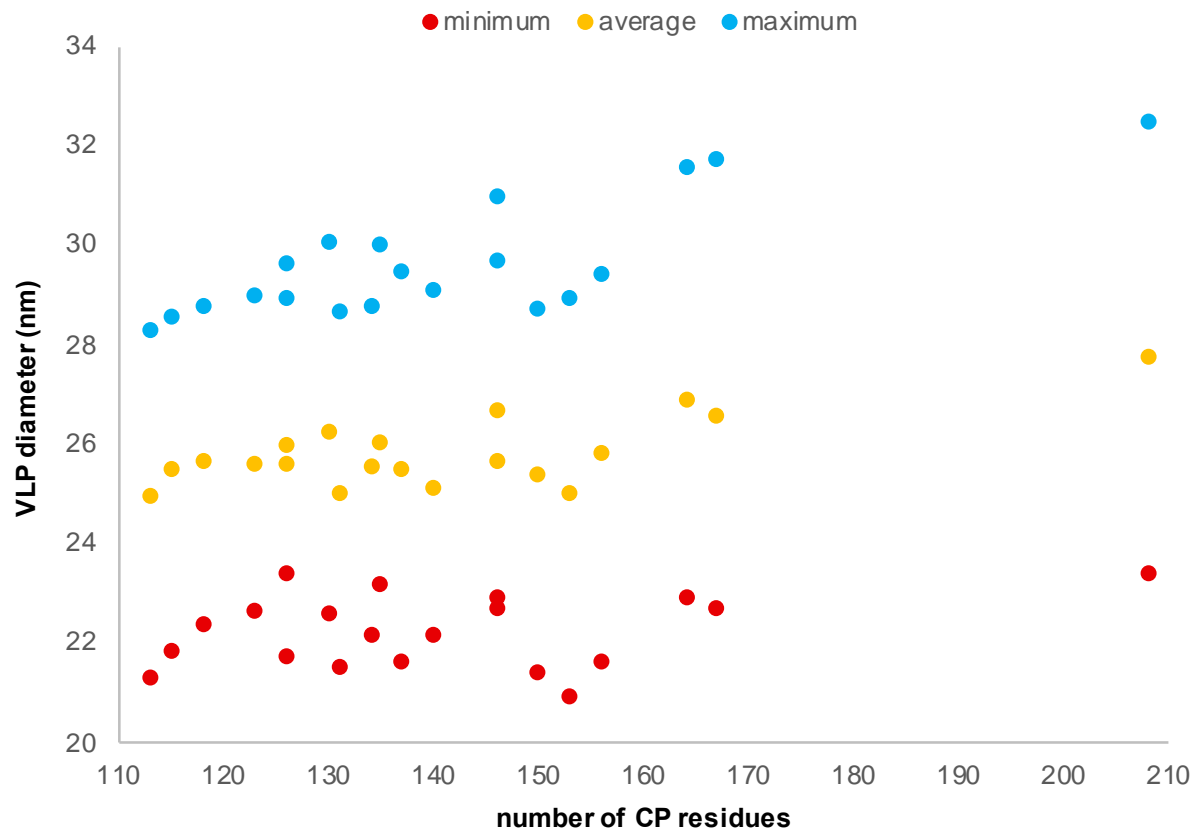

**Figure S3. Relationship between coat protein length and particle size in the novel ssRNA phages.** Data used for generating the graph are provided in Table S1.

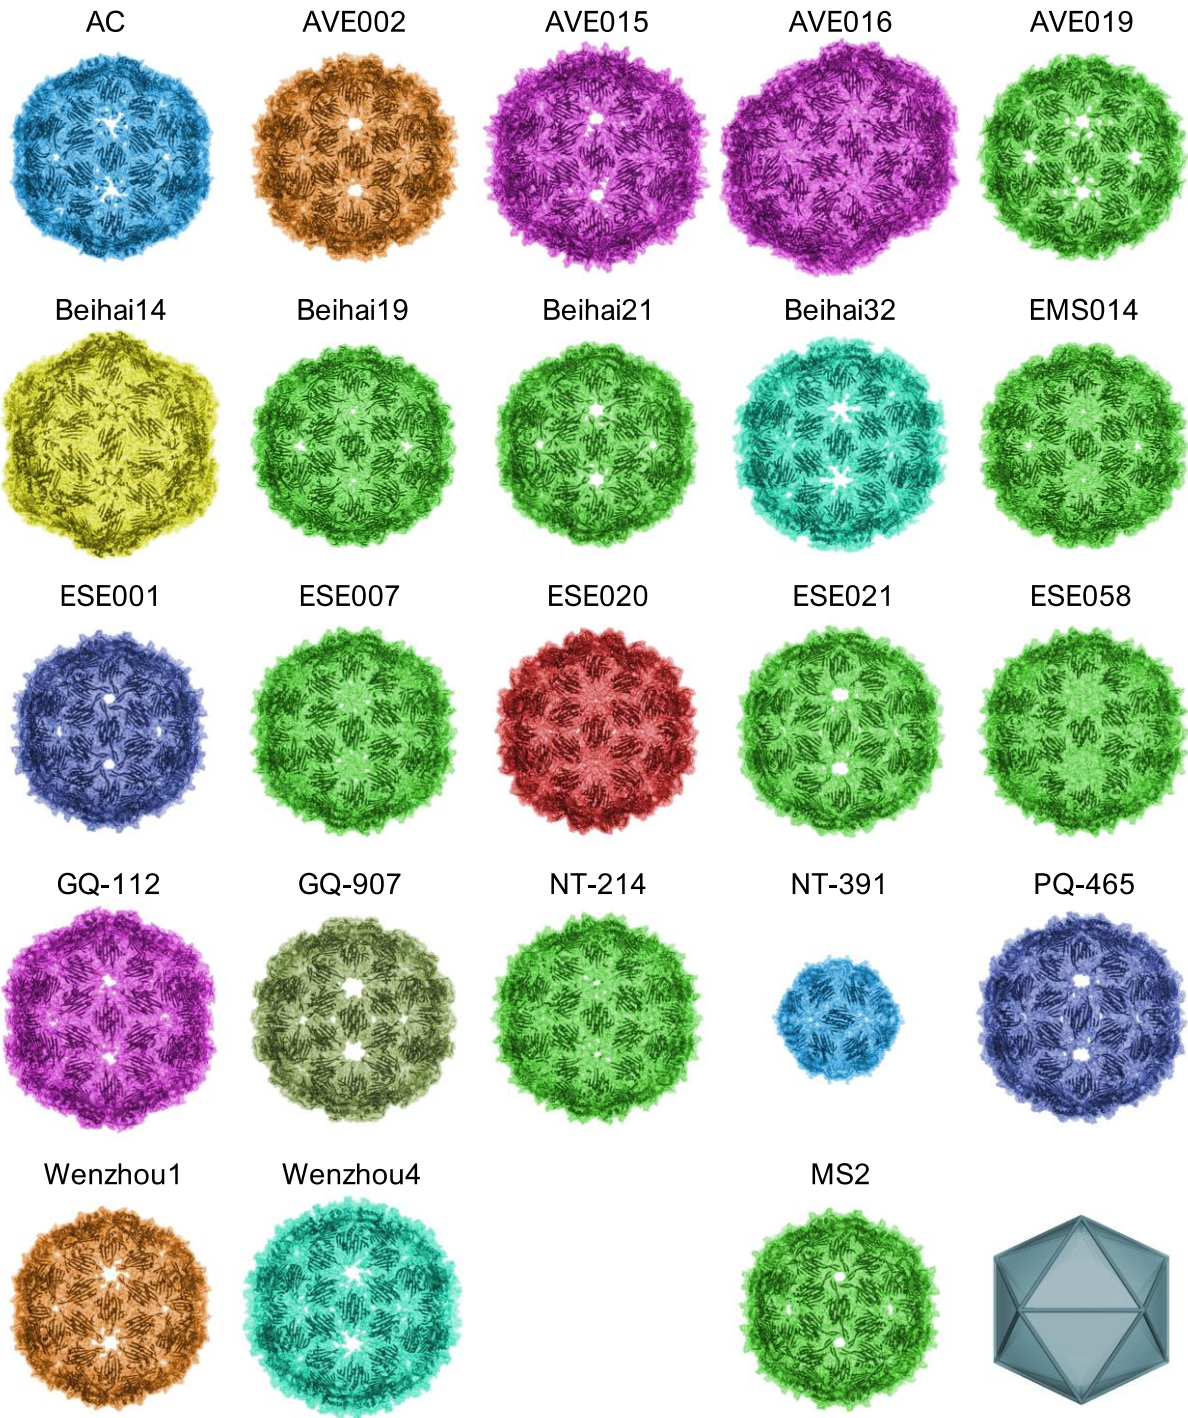

**Figure S4. Structure of the novel ssRNA phage VLPs.** Coat protein dimers are shown in cartoon representation inside semi-transparent VLP molecular surfaces and are differently colored as per different CP similarity groups. The back sides of the particles are clipped for clarity. All particles are shown on the same scale and in an orientation corresponding to the regular icosahedron on bottom right. Structure of the ssRNA bacteriophage MS2 is included for comparison.

### AVE015

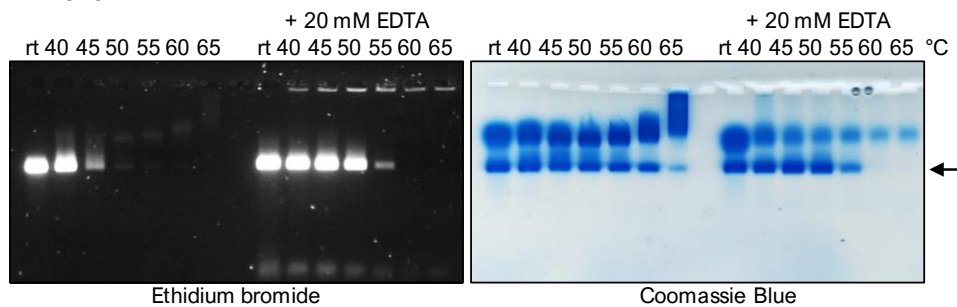

### AVE019

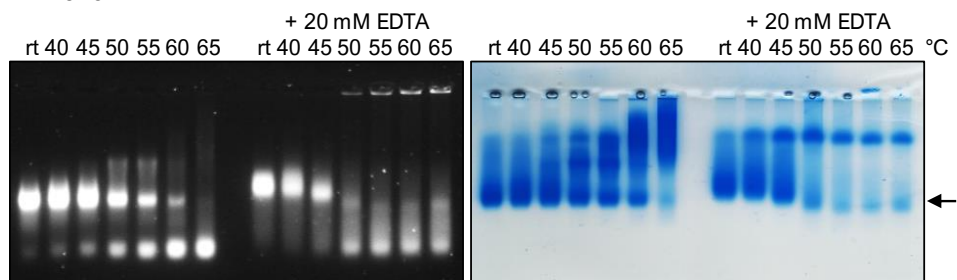

### Beihai19

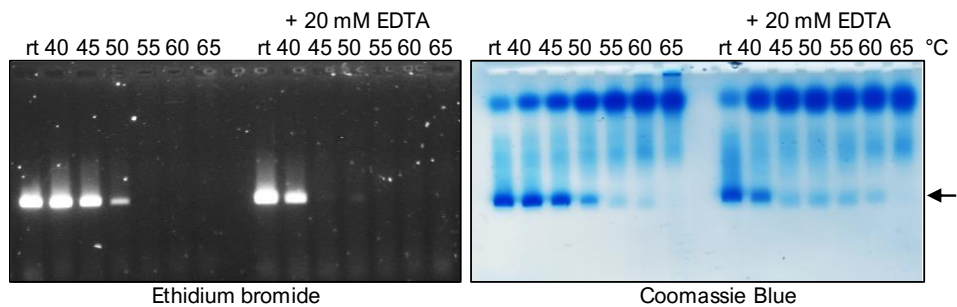

### Beihai32

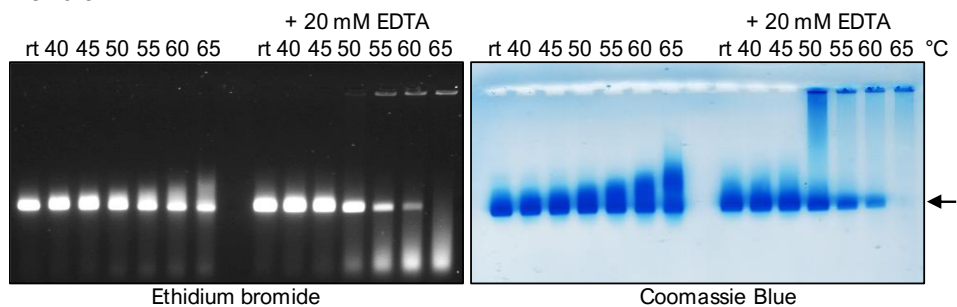

ESE007

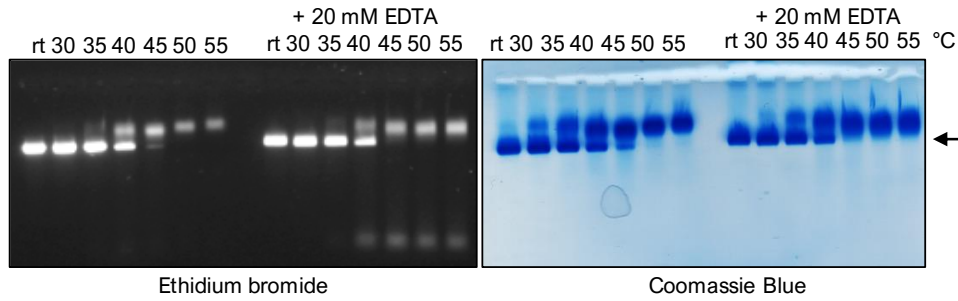

ESE021

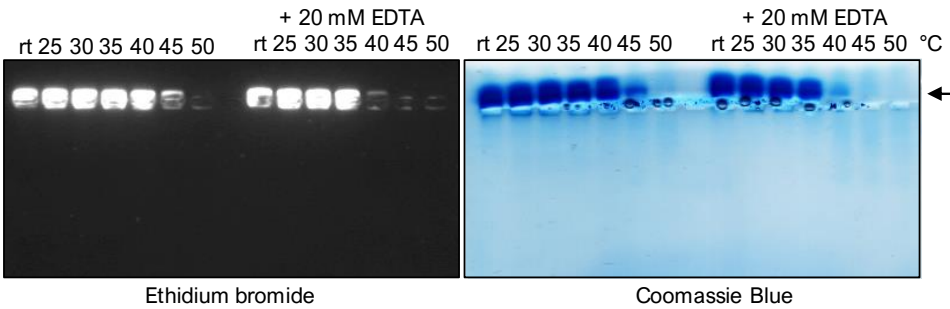

ESE058

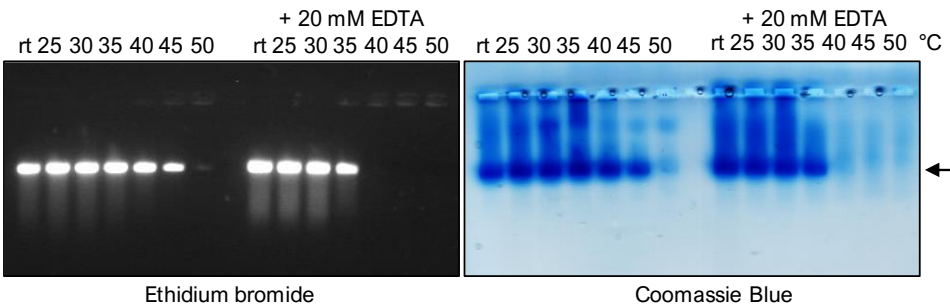

ESE020

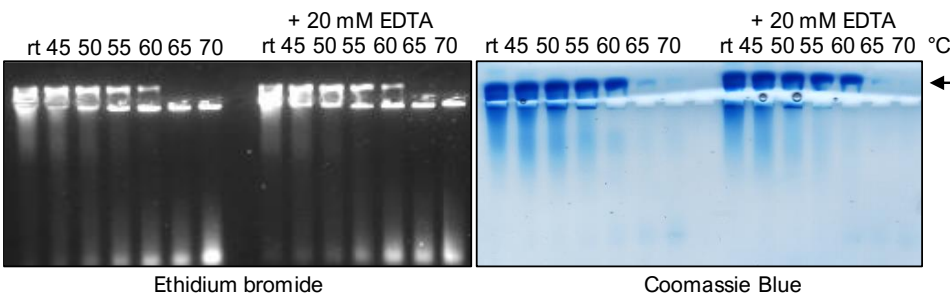

**Figure S5. Stabilizing role of divalent metal ions in the novel ssRNA phage particles.**

Shown are agarose gels after electrophoresis of heated metal ion-containing virus-like particles in absence and in presence of EDTA. Temperature at which each sample was heated is provided above each track; rt: unheated control at room temperature. The arrow indicates the position of VLPs. ESE020 VLPs were used as a control for particles not containing bound metal ions.

| name     | GenBank accession | CP similarity group | CP length | VLP diameter (nm) |         |         | CP dimer interface area (Å <sup>2</sup> ) |        |        |
|----------|-------------------|---------------------|-----------|-------------------|---------|---------|-------------------------------------------|--------|--------|
|          |                   |                     |           | minimum           | average | maximum | AB                                        | CC     |        |
| AC       | KF616864          | AC                  | 115       | 21.9              | 25.5    | 28.6    | 1872.7                                    | 1788.5 |        |
| AVE002   | KT462696          | Cb5                 | 140       | 22.2              | 25.1    | 29.1    | 2921.7                                    | 2722.1 |        |
| AVE015   |                   | AVE015              | 167       | 22.7              | 26.6    | 31.8    | 3368.9                                    | 2689.9 |        |
| AVE016   |                   | AVE015              | 166       |                   |         |         | 4371.4                                    | 4114.0 |        |
| AVE019   |                   | MS2                 | 123       | 22.7              | 25.6    | 29.0    | 2353.9                                    | 2203.7 |        |
| Beihai14 | KX883502          | Beihai14            | 208       | 23.4              | 27.8    | 32.5    | 5367.1                                    | 5293.4 |        |
| Beihai19 | KX883464          | MS2                 | 134       | 22.2              | 25.6    | 28.8    | 3093.1                                    | 3481.1 |        |
| Beihai21 | KX883506          | MS2                 | 126       | 21.7              | 25.6    | 29.0    | 2639.0                                    | 2458.2 |        |
| Beihai32 | KX883479          | Beihai32            | 130       | 22.6              | 26.3    | 30.1    | 1997.6                                    | 1942.1 |        |
| EMS014   | KT462710          | MS2                 | 156       | 21.6              | 25.9    | 29.4    | 3747.3                                    | 3315.9 |        |
| ESE001   |                   | AP205               | 118       | 22.4              | 25.7    | 28.8    | 2306.3                                    | 2486.9 |        |
| ESE007   |                   | MS2                 | 137       | 21.7              | 25.5    | 29.5    | 3971.7                                    | 3623.3 |        |
| ESE020   |                   | ESE020              | 153       | 20.9              | 25.1    | 29.0    | 2692.3                                    | 2500.4 |        |
| ESE021   |                   | MS2                 | 150       | 21.4              | 25.4    | 28.7    | 4095.0                                    | 3629.4 |        |
| ESE058   |                   | MS2                 | 146       | 22.7              | 25.7    | 29.7    | 4669.7                                    | 4685.6 |        |
| GQ-907   |                   | GALQ01034907        | ESE017    | 131               | 22.9    | 26.9    | 31.6                                      | 2793.9 | 3026.7 |
| GQ-112   |                   | GALQ01044112        | AVE015    | 164               | 21.5    | 25.0    | 28.7                                      | 2634.4 | 2423.0 |
| NT-214   |                   | NFYT01000214        | MS2       | 135               | 23.2    | 26.0    | 30.0                                      | 3625.9 | 3468.0 |
| NT-391   |                   | NFYT01000391        | AC        | 123               | 12.1    | 15.2    | 18.3                                      | 1779.1 | 1778.0 |
| PQ-465   | PQDQ01001465      | AP205               | 126       | 23.4              | 26.0    | 29.7    | 2582.3                                    | 2296.4 |        |
| Wenzhou1 | KX883612          | Cb5                 | 113       | 21.3              | 25.0    | 28.3    | 2342.2                                    | 2139.1 |        |
| Wenzhou4 | KX883621          | Beihai32            | 146       | 22.9              | 26.7    | 31.0    | 1676.8                                    | 1927.0 |        |

**Table S1. Properties of the ssRNA phage coat proteins and virus-like particles used in the current study.** Accession numbers are provided for the respective genome sequences; entries without an accession number were sourced from Dataset S1 from (12). The VLP diameter was defined by calculating distances to all C $\alpha$  atoms from the particle center and then finding the minimum, average and maximum values. The interface areas for CP dimers were calculated using PISA (51) and were defined as the buried surface between an AB or CC dimer and their four surrounding CP dimers in the particle.



|                                 | AC                                                                             | AVE002                                                                        | AVE015                                                                        | AVE016                                                                         |
|---------------------------------|--------------------------------------------------------------------------------|-------------------------------------------------------------------------------|-------------------------------------------------------------------------------|--------------------------------------------------------------------------------|
| PDB ID                          | 6YF7                                                                           | 6YF9                                                                          | 6YFA                                                                          | 6YFB                                                                           |
| <b>Crystallization</b>          |                                                                                |                                                                               |                                                                               |                                                                                |
| Conditions                      | 0.85 M ammonium sulfate                                                        | 46% MPD, 0.1 M ammonium nitrate, 0.1 M MES pH 6.5                             | 22% MPD, 0.1 M sodium nitrate, 0.1 M sodium acetate pH 4.6                    | 30% MPD, 0.2 M sodium citrate, 0.1 M HEPES pH 7.5                              |
| <b>Data collection</b>          |                                                                                |                                                                               |                                                                               |                                                                                |
| Date                            | 2015-11-05                                                                     | 2018-05-09                                                                    | 2018-05-09                                                                    | 2018-01-27                                                                     |
| Site                            | MAX II                                                                         | BESSY II                                                                      | BESSY II                                                                      | BESSY II                                                                       |
| Beamline                        | I911-3                                                                         | MX 14.1                                                                       | MX 14.1                                                                       | MX 14.1                                                                        |
| Wavelength (Å)                  | 0.97934                                                                        | 0.9184                                                                        | 0.9184                                                                        | 0.9184                                                                         |
| <b>Data reduction</b>           |                                                                                |                                                                               |                                                                               |                                                                                |
| Space group                     | C 2                                                                            | P 21 21 21                                                                    | I 2 3                                                                         | P 21                                                                           |
| Cell parameters                 | a = 432.29<br>b = 307.87<br>c = 679.45<br>α = 90.00<br>β = 107.15<br>γ = 90.00 | a = 278.09<br>b = 390.21<br>c = 554.47<br>α = 90.00<br>β = 90.00<br>γ = 90.00 | a = 559.31<br>b = 559.31<br>c = 559.31<br>α = 90.00<br>β = 90.00<br>γ = 90.00 | a = 325.47<br>b = 298.52<br>c = 417.12<br>α = 90.00<br>β = 100.00<br>γ = 90.00 |
| Total number of observations    | 1069421                                                                        | 6155935                                                                       | 8135712                                                                       | 2073077                                                                        |
| Number of unique reflections    | 591127                                                                         | 970502                                                                        | 430490                                                                        | 855258                                                                         |
| Resolution (Å)                  | 44.26 - 3.40                                                                   | 62.21 - 3.20                                                                  | 61.77 - 3.30                                                                  | 49.32 - 3.59                                                                   |
| Highest resolution bin          | 3.58 - 3.40                                                                    | 3.37 - 3.20                                                                   | 3.48 - 3.30                                                                   | 3.81 - 3.59                                                                    |
| Multiplicity                    | 1.8 (1.7)                                                                      | 6.3 (5.9)                                                                     | 18.9 (18.6)                                                                   | 2.4 (2.4)                                                                      |
| Completeness (%)                | 51.1 (47.3)                                                                    | 98.8 (97.0)                                                                   | 100.0 (100.0)                                                                 | 93.9 (92.4)                                                                    |
| R-merge                         | 0.198 (0.749)                                                                  | 0.672 (1.727)                                                                 | 0.702 (2.890)                                                                 | 0.471 (2.451)                                                                  |
| Mean I/sig(I)                   | 3.3 (1.0)                                                                      | 3.3 (1.1)                                                                     | 4.6 (1.1)                                                                     | 2.9 (0.4)                                                                      |
| CC(1/2)                         | 0.965 (0.455)                                                                  | 0.846 (0.190)                                                                 | 0.970 (0.412)                                                                 | 0.924 (0.189)                                                                  |
| Wilson B-factor                 | 32.2                                                                           | 38.5                                                                          | 66.5                                                                          | 75.7                                                                           |
| <b>Refinement</b>               |                                                                                |                                                                               |                                                                               |                                                                                |
| Resolution                      | 44.262 - 3.400                                                                 | 62.205 - 3.196                                                                | 61.765 - 3.300                                                                | 49.317 - 3.591                                                                 |
| Highest resolution bin          | 3.521 - 3.400                                                                  | 3.310 - 3.196                                                                 | 3.418 - 3.300                                                                 | 3.720 - 3.591                                                                  |
| <b>Number of reflections</b>    |                                                                                |                                                                               |                                                                               |                                                                                |
| work set                        | 590873                                                                         | 969144                                                                        | 429748                                                                        | 845958                                                                         |
| free set                        | 29845                                                                          | 6518                                                                          | 9978                                                                          | 9894                                                                           |
| R-work                          | 0.2681 (0.4047)                                                                | 0.2610 (0.3736)                                                               | 0.2312 (0.3436)                                                               | 0.2779 (0.3795)                                                                |
| R-free                          | 0.2700 (0.4096)                                                                | 0.2664 (0.3812)                                                               | 0.2331 (0.3361)                                                               | 0.2829 (0.3800)                                                                |
| <b>Number of atoms</b>          |                                                                                |                                                                               |                                                                               |                                                                                |
| protein                         | 231390                                                                         | 184320                                                                        | 78960                                                                         | 275100                                                                         |
| RNA                             |                                                                                |                                                                               |                                                                               |                                                                                |
| water                           |                                                                                |                                                                               |                                                                               |                                                                                |
| other                           |                                                                                |                                                                               | 20                                                                            |                                                                                |
| <b>Average B-factor</b>         |                                                                                |                                                                               |                                                                               |                                                                                |
| protein                         | 69.78                                                                          | 33.9                                                                          | 66.52                                                                         | 103.09                                                                         |
| RNA                             |                                                                                |                                                                               |                                                                               |                                                                                |
| water                           |                                                                                |                                                                               |                                                                               |                                                                                |
| other                           |                                                                                |                                                                               | 59.46                                                                         |                                                                                |
| <b>rmsd from ideal geometry</b> |                                                                                |                                                                               |                                                                               |                                                                                |
| bonds (Å)                       | 0.005                                                                          | 0.005                                                                         | 0.006                                                                         | 0.009                                                                          |
| angles (°)                      | 0.697                                                                          | 0.812                                                                         | 0.865                                                                         | 1.09                                                                           |
| <b>Ramachandran plot</b>        |                                                                                |                                                                               |                                                                               |                                                                                |
| favored (%)                     | 99.11                                                                          | 98.79                                                                         | 98.18                                                                         | 98.45                                                                          |
| allowed (%)                     | 100.00                                                                         | 100.00                                                                        | 100.00                                                                        | 100.00                                                                         |
| Rotamer outliers (%)            | 0.34                                                                           | 0.00                                                                          | 0.00                                                                          | 0.71                                                                           |
| Clashscore                      | 10.67                                                                          | 8.47                                                                          | 8.65                                                                          | 15.62                                                                          |

|                                 | <b>AVE019</b>                                                                    | <b>Beihai14</b>                                                               | <b>Beihai19</b>                                                               | <b>Beihai21</b>                                                               |
|---------------------------------|----------------------------------------------------------------------------------|-------------------------------------------------------------------------------|-------------------------------------------------------------------------------|-------------------------------------------------------------------------------|
| PDB ID                          | 6YFC                                                                             | 6YFD                                                                          | 6YFE                                                                          | 6YFF                                                                          |
| <b>Crystallization</b>          |                                                                                  |                                                                               |                                                                               |                                                                               |
| Conditions                      | 46% MPD, 0.1 M HEPES pH 7.5                                                      | 5% PEG 4000, 0.1 M magnesium chloride, 0.1 M MES pH 6.5                       | 66% MPD, 100 mM Tris-HCl pH 8.0                                               | 30% PEG 400, 0.2 M sodium citrate, 0.1 M Tris-HCl pH 8.5                      |
| <b>Data collection</b>          |                                                                                  |                                                                               |                                                                               |                                                                               |
| Date                            | 2019-01-24                                                                       | 2019-03-22                                                                    | 2017-09-01                                                                    | 2018-01-27                                                                    |
| Site                            | BESSY II                                                                         | BESSY II                                                                      | BESSY II                                                                      | BESSY II                                                                      |
| Beamline                        | MX 14.1                                                                          | MX 14.1                                                                       | MX 14.1                                                                       | MX 14.1                                                                       |
| Wavelength (Å)                  | 0.9184                                                                           | 0.9184                                                                        | 0.9184                                                                        | 0.9184                                                                        |
| <b>Data reduction</b>           |                                                                                  |                                                                               |                                                                               |                                                                               |
| Space group                     | P 1                                                                              | P 21 21 2                                                                     | P 21 21 2                                                                     | I 2 2 2                                                                       |
| Cell parameters                 | a = 296.42<br>b = 277.20<br>c = 277.44<br>α = 103.91<br>β = 117.39<br>γ = 106.96 | a = 328.67<br>b = 373.71<br>c = 310.50<br>α = 90.00<br>β = 90.00<br>γ = 90.00 | a = 298.11<br>b = 325.05<br>c = 346.02<br>α = 90.00<br>β = 90.00<br>γ = 90.00 | a = 296.94<br>b = 306.88<br>c = 322.56<br>α = 90.00<br>β = 90.00<br>γ = 90.00 |
| Total number of observations    | 3314889                                                                          | 2846288                                                                       | 1102377                                                                       | 1499728                                                                       |
| Number of unique reflections    | 912012                                                                           | 536242                                                                        | 323252                                                                        | 264751                                                                        |
| Resolution (Å)                  | 49.27 - 3.25                                                                     | 49.34 - 3.30                                                                  | 49.44 - 3.79                                                                  | 48.94 - 3.09                                                                  |
| Highest resolution bin          | 3.44 - 3.25                                                                      | 3.50 - 3.30                                                                   | 4.02 - 3.79                                                                   | 3.28 - 3.09                                                                   |
| Multiplicity                    | 3.6 (3.5)                                                                        | 5.3 (2.5)                                                                     | 3.4 (3.4)                                                                     | 5.7 (5.5)                                                                     |
| Completeness (%)                | 94.0 (88.0)                                                                      | 94.4 (76.8)                                                                   | 98.0 (95.3)                                                                   | 99.1 (95.4)                                                                   |
| R-merge                         | 0.372 (2.509)                                                                    | 0.647 (2.255)                                                                 | 0.372 (1.495)                                                                 | 0.358 (2.785)                                                                 |
| Mean I/sig(I)                   | 4.3 (0.5)                                                                        | 2.3 (0.5)                                                                     | 3.6 (0.8)                                                                     | 5.6 (0.6)                                                                     |
| CC(1/2)                         | 0.988 (0.690)                                                                    | 0.937 (0.171)                                                                 | 0.965 (0.243)                                                                 | 0.985 (0.221)                                                                 |
| Wilson B-factor                 | 69.0                                                                             | 81.1                                                                          | 83.5                                                                          | 66.5                                                                          |
| <b>Refinement</b>               |                                                                                  |                                                                               |                                                                               |                                                                               |
| Resolution                      | 49.267 - 3.246                                                                   | 49.332 - 3.300                                                                | 41.392 - 3.794                                                                | 48.938 - 3.089                                                                |
| Highest resolution bin          | 3.362 - 3.246                                                                    | 3.418 - 3.300                                                                 | 3.930 - 3.794                                                                 | 3.200 - 3.089                                                                 |
| <b>Number of reflections</b>    |                                                                                  |                                                                               |                                                                               |                                                                               |
| work set                        | 898220                                                                           | 525682                                                                        | 322856                                                                        | 263402                                                                        |
| free set                        | 9890                                                                             | 9824                                                                          | 9968                                                                          | 9929                                                                          |
| R-work                          | 0.2413 (0.3928)                                                                  | 0.2649 (0.3861)                                                               | 0.2609 (0.3706)                                                               | 0.2661 (0.3845)                                                               |
| R-free                          | 0.2393 (0.3869)                                                                  | 0.2670 (0.3925)                                                               | 0.2668 (0.3807)                                                               | 0.2710 (0.3790)                                                               |
| <b>Number of atoms</b>          |                                                                                  |                                                                               |                                                                               |                                                                               |
| protein                         | 169200                                                                           | 126960                                                                        | 89040                                                                         | 43650                                                                         |
| RNA                             |                                                                                  |                                                                               |                                                                               |                                                                               |
| water                           |                                                                                  |                                                                               |                                                                               |                                                                               |
| other                           | 60                                                                               |                                                                               | 30                                                                            |                                                                               |
| <b>Average B-factor</b>         |                                                                                  |                                                                               |                                                                               |                                                                               |
| protein                         | 97.39                                                                            | 92.15                                                                         | 107.17                                                                        | 80.85                                                                         |
| RNA                             |                                                                                  |                                                                               |                                                                               |                                                                               |
| water                           |                                                                                  |                                                                               |                                                                               |                                                                               |
| other                           | 64.63                                                                            |                                                                               | 53.34                                                                         |                                                                               |
| <b>rmsd from ideal geometry</b> |                                                                                  |                                                                               |                                                                               |                                                                               |
| bonds (Å)                       | 0.005                                                                            | 0.006                                                                         | 0.005                                                                         | 0.005                                                                         |
| angles (°)                      | 0.786                                                                            | 0.848                                                                         | 0.74                                                                          | 0.794                                                                         |
| <b>Ramachandran plot</b>        |                                                                                  |                                                                               |                                                                               |                                                                               |
| favored (%)                     | 98.88                                                                            | 98.06                                                                         | 98.43                                                                         | 98.12                                                                         |
| allowed (%)                     | 100.00                                                                           | 100.00                                                                        | 100.00                                                                        | 100.00                                                                        |
| Rotamer outliers (%)            | 0.63                                                                             | 0.00                                                                          | 0.00                                                                          | 0.00                                                                          |
| Clashscore                      | 10.22                                                                            | 7.93                                                                          | 12.21                                                                         | 9.82                                                                          |

|                                 | Beihai32                                                                      | EMS014 (VLP)                                                                  | EMS014 (subunit)                                                           | ESE001                                                                         |
|---------------------------------|-------------------------------------------------------------------------------|-------------------------------------------------------------------------------|----------------------------------------------------------------------------|--------------------------------------------------------------------------------|
| PDB ID                          | 6YFG                                                                          | 6YFH                                                                          | 6YFI                                                                       | 6YFJ                                                                           |
| <b>Crystallization</b>          |                                                                               |                                                                               |                                                                            |                                                                                |
| Conditions                      | 26% MPD, 0.1-0.2 M sodium nitrate, 0.1 M HEPES pH 7.5                         | 0.55 M sodium malonate, 0.25% Jeffamine ED-2003, 0.05 M HEPES pH 7.0          | 10% PEG 8000, 0.1 M sodium chloride, 0.05 M phosphate/citrate pH 4.2       | 30% MPD, 5 mM DTT, 0.1 M sodium acetate pH 4.6                                 |
| <b>Data collection</b>          |                                                                               |                                                                               |                                                                            |                                                                                |
| Date                            | 2018-10-19                                                                    | 2018-05-09                                                                    | 2018-05-09                                                                 | 2017-09-01                                                                     |
| Site                            | MAX IV                                                                        | BESSY II                                                                      | BESSY II                                                                   | BESSY II                                                                       |
| Beamline                        | BioMAX                                                                        | MX 14.1                                                                       | MX 14.1                                                                    | MX 14.1                                                                        |
| Wavelength (Å)                  | 0.97776                                                                       | 0.9184                                                                        | 0.9184                                                                     | 0.9184                                                                         |
| <b>Data reduction</b>           |                                                                               |                                                                               |                                                                            |                                                                                |
| Space group                     | P 1                                                                           | C 2 2 21                                                                      | P 21 21 21                                                                 | R 3                                                                            |
| Cell parameters                 | a = 291.95<br>b = 292.53<br>c = 469.20<br>α = 75.79<br>β = 77.92<br>γ = 69.51 | a = 287.11<br>b = 492.50<br>c = 553.71<br>α = 90.00<br>β = 90.00<br>γ = 90.00 | a = 71.56<br>b = 92.70<br>c = 94.82<br>α = 90.00<br>β = 90.00<br>γ = 90.00 | a = 283.35<br>b = 283.35<br>c = 666.04<br>α = 90.00<br>β = 90.00<br>γ = 120.00 |
| Total number of observations    | 2265552                                                                       | 1622482                                                                       | 1109958                                                                    | 1123410                                                                        |
| Number of unique reflections    | 1227697                                                                       | 352052                                                                        | 173303                                                                     | 312316                                                                         |
| Resolution (Å)                  | 49.84 - 3.90                                                                  | 49.41 - 3.89                                                                  | 48.63 - 1.25                                                               | 48.95 - 3.23                                                                   |
| Highest resolution bin          | 4.13 - 3.90                                                                   | 4.13 - 3.89                                                                   | 1.32 - 1.25                                                                | 3.43 - 3.23                                                                    |
| Multiplicity                    | 1.8 (1.9)                                                                     | 4.6 (4.3)                                                                     | 6.4 (6.0)                                                                  | 3.6 (3.4)                                                                      |
| Completeness (%)                | 96.2 (93.0)                                                                   | 99.1 (96.7)                                                                   | 99.1 (94.7)                                                                | 97.9 (93.6)                                                                    |
| R-merge                         | 0.209 (1.559)                                                                 | 0.859 (3.144)                                                                 | 0.085 (1.054)                                                              | 0.284 (1.738)                                                                  |
| Mean I/sig(I)                   | 3.0 (0.4)                                                                     | 2.3 (0.5)                                                                     | 8.5 (1.0)                                                                  | 4.4 (0.6)                                                                      |
| CC(1/2)                         | 0.985 (0.151)                                                                 | 0.836 (0.136)                                                                 | 0.998 (0.825)                                                              | 0.984 (0.235)                                                                  |
| Wilson B-factor                 | 118.2                                                                         | 76.7                                                                          | 21.6                                                                       | 76.2                                                                           |
| <b>Refinement</b>               |                                                                               |                                                                               |                                                                            |                                                                                |
| Resolution                      | 49.833 - 3.897                                                                | 49.357 - 3.893                                                                | 42.210 - 1.248                                                             | 48.944 - 3.233                                                                 |
| Highest resolution bin          | 4.037 - 3.897                                                                 | 4.032 - 3.893                                                                 | 1.293 - 1.248                                                              | 3.348 - 3.233                                                                  |
| <b>Number of reflections</b>    |                                                                               |                                                                               |                                                                            |                                                                                |
| work set                        | 1216193                                                                       | 346121                                                                        | 172802                                                                     | 310956                                                                         |
| free set                        | 19851                                                                         | 9855                                                                          | 8618                                                                       | 10007                                                                          |
| R-work                          | 0.2821 (0.3974)                                                               | 0.2665 (0.3785)                                                               | 0.1753 (0.3683)                                                            | 0.2317 (0.3755)                                                                |
| R-free                          | 0.2853 (0.4048)                                                               | 0.2699 (0.3696)                                                               | 0.1974 (0.3796)                                                            | 0.2324 (0.3808)                                                                |
| <b>Number of atoms</b>          |                                                                               |                                                                               |                                                                            |                                                                                |
| protein                         | 362880                                                                        | 104400                                                                        | 4450                                                                       | 52380                                                                          |
| RNA                             |                                                                               |                                                                               |                                                                            |                                                                                |
| water                           |                                                                               |                                                                               | 1076                                                                       |                                                                                |
| other                           | 120                                                                           |                                                                               |                                                                            |                                                                                |
| <b>Average B-factor</b>         |                                                                               |                                                                               |                                                                            |                                                                                |
| protein                         | 170.05                                                                        | 111.97                                                                        | 22.13                                                                      | 97.97                                                                          |
| RNA                             |                                                                               |                                                                               |                                                                            |                                                                                |
| water                           |                                                                               |                                                                               | 33.61                                                                      |                                                                                |
| other                           | 148.62                                                                        |                                                                               |                                                                            |                                                                                |
| <b>rmsd from ideal geometry</b> |                                                                               |                                                                               |                                                                            |                                                                                |
| bonds (Å)                       | 0.006                                                                         | 0.004                                                                         | 0.005                                                                      | 0.006                                                                          |
| angles (°)                      | 0.870                                                                         | 0.697                                                                         | 0.762                                                                      | 0.826                                                                          |
| <b>Ramachandran plot</b>        |                                                                               |                                                                               |                                                                            |                                                                                |
| favored (%)                     | 98.18                                                                         | 99.13                                                                         | 98.09                                                                      | 99.14                                                                          |
| allowed (%)                     | 100.00                                                                        | 100.00                                                                        | 100.00                                                                     | 100.00                                                                         |
| Rotamer outliers (%)            | 0.00                                                                          | 0.00                                                                          | 0.00                                                                       | 0.00                                                                           |
| Clashscore                      | 14.38                                                                         | 5.62                                                                          | 1.45                                                                       | 8.54                                                                           |

|                                 | <b>ESE007</b>                                                                                      | <b>ESE020</b>                                                                                      | <b>ESE021</b>                                                                                     | <b>ESE058</b>                                                                                      |
|---------------------------------|----------------------------------------------------------------------------------------------------|----------------------------------------------------------------------------------------------------|---------------------------------------------------------------------------------------------------|----------------------------------------------------------------------------------------------------|
| PDB ID                          | 6YFK                                                                                               | 6YFL                                                                                               | 6YFM                                                                                              | 6YFN                                                                                               |
| <b>Crystallization</b>          |                                                                                                    |                                                                                                    |                                                                                                   |                                                                                                    |
| Conditions                      | 20 % PEG 10000, 0.1 M HEPES pH 7.5                                                                 | 36% PEG 300, 0.05 M Bicine pH 9.0                                                                  | 5% PEG 3000, 0.08 M zinc acetate, 0.05 M sodium acetate pH 4.6                                    | 12.5% PEG 1000, 7% PEG 8000                                                                        |
| <b>Data collection</b>          |                                                                                                    |                                                                                                    |                                                                                                   |                                                                                                    |
| Date                            | 2018-01-27                                                                                         | 2017-11-04                                                                                         | 2018-05-09                                                                                        | 2017-11-04                                                                                         |
| Site                            | BESSY II                                                                                           | BESSY II                                                                                           | BESSY II                                                                                          | BESSY II                                                                                           |
| Beamline                        | MX 14.1                                                                                            | MX 14.1                                                                                            | MX 14.1                                                                                           | MX 14.1                                                                                            |
| Wavelength (Å)                  | 0.9184                                                                                             | 0.9184                                                                                             | 0.9184                                                                                            | 0.9184                                                                                             |
| <b>Data reduction</b>           |                                                                                                    |                                                                                                    |                                                                                                   |                                                                                                    |
| Space group                     | R 3                                                                                                | R 3 2                                                                                              | I 2 2 2                                                                                           | P 32 2 1                                                                                           |
| Cell parameters                 | a = 278.20<br>b = 278.20<br>c = 661.50<br>$\alpha$ = 90.00<br>$\beta$ = 90.00<br>$\gamma$ = 120.00 | a = 419.73<br>b = 419.73<br>c = 761.14<br>$\alpha$ = 90.00<br>$\beta$ = 90.00<br>$\gamma$ = 120.00 | a = 282.02<br>b = 302.81<br>c = 352.16<br>$\alpha$ = 90.00<br>$\beta$ = 90.00<br>$\gamma$ = 90.00 | a = 500.89<br>b = 500.89<br>c = 287.05<br>$\alpha$ = 90.00<br>$\beta$ = 90.00<br>$\gamma$ = 120.00 |
| Total number of observations    | 338161                                                                                             | 1819911                                                                                            | 2023525                                                                                           | 6181589                                                                                            |
| Number of unique reflections    | 132293                                                                                             | 380562                                                                                             | 378707                                                                                            | 679725                                                                                             |
| Resolution (Å)                  | 38.01 - 3.70                                                                                       | 99.46 - 3.30                                                                                       | 60.08 - 2.76                                                                                      | 49.26 - 3.19                                                                                       |
| Highest resolution bin          | 3.90 - 3.70                                                                                        | 3.48 - 3.30                                                                                        | 2.91 - 2.76                                                                                       | 3.38 - 3.19                                                                                        |
| Multiplicity                    | 2.6 (1.2)                                                                                          | 4.8 (4.1)                                                                                          | 5.3 (5.6)                                                                                         | 9.1 (9.1)                                                                                          |
| Completeness (%)                | 64.9 (28.5)                                                                                        | 99.5 (98.9)                                                                                        | 99.4 (99.8)                                                                                       | 99.8 (98.8)                                                                                        |
| R-merge                         | 0.218 (0.817)                                                                                      | 0.417 (2.056)                                                                                      | 0.362 (1.532)                                                                                     | 0.796 (3.730)                                                                                      |
| Mean I/sig(I)                   | 3.2 (0.6)                                                                                          | 4.3 (0.7)                                                                                          | 4.7 (1.1)                                                                                         | 3.7 (0.6)                                                                                          |
| CC(1/2)                         | 0.968 (0.152)                                                                                      | 0.952 (0.152)                                                                                      | 0.957 (0.293)                                                                                     | 0.958 (0.234)                                                                                      |
| Wilson B-factor                 | 68.8                                                                                               | 74.9                                                                                               | 33.7                                                                                              | 53.1                                                                                               |
| <b>Refinement</b>               |                                                                                                    |                                                                                                    |                                                                                                   |                                                                                                    |
| Resolution                      | 38.003 - 3.700                                                                                     | 96.967 - 3.300                                                                                     | 60.079 - 2.762                                                                                    | 49.258 - 3.189                                                                                     |
| Highest resolution bin          | 3.832 - 3.700                                                                                      | 3.418 - 3.300                                                                                      | 2.861 - 2.762                                                                                     | 3.303 - 3.189                                                                                      |
| <b>Number of reflections</b>    |                                                                                                    |                                                                                                    |                                                                                                   |                                                                                                    |
| work set                        | 131994                                                                                             | 379266                                                                                             | 378514                                                                                            | 677292                                                                                             |
| free set                        | 5027                                                                                               | 9971                                                                                               | 9967                                                                                              | 9955                                                                                               |
| R-work                          | 0.2351 (0.3812)                                                                                    | 0.2477 (0.3936)                                                                                    | 0.2445 (0.3695)                                                                                   | 0.2308 (0.3770)                                                                                    |
| R-free                          | 0.2375 (0.3643)                                                                                    | 0.2506 (0.3825)                                                                                    | 0.2480 (0.3645)                                                                                   | 0.2342 (0.3802)                                                                                    |
| <b>Number of atoms</b>          |                                                                                                    |                                                                                                    |                                                                                                   |                                                                                                    |
| protein                         | 62160                                                                                              | 63520                                                                                              | 50130                                                                                             | 101460                                                                                             |
| RNA                             |                                                                                                    |                                                                                                    |                                                                                                   |                                                                                                    |
| water                           |                                                                                                    |                                                                                                    |                                                                                                   |                                                                                                    |
| other                           | 20                                                                                                 |                                                                                                    | 60                                                                                                | 30                                                                                                 |
| <b>Average B-factor</b>         |                                                                                                    |                                                                                                    |                                                                                                   |                                                                                                    |
| protein                         | 84.62                                                                                              | 71.17                                                                                              | 36.12                                                                                             | 60.45                                                                                              |
| RNA                             |                                                                                                    |                                                                                                    |                                                                                                   |                                                                                                    |
| water                           |                                                                                                    |                                                                                                    |                                                                                                   |                                                                                                    |
| other                           | 51.49                                                                                              |                                                                                                    | 154.19                                                                                            | 78.52                                                                                              |
| <b>rmsd from ideal geometry</b> |                                                                                                    |                                                                                                    |                                                                                                   |                                                                                                    |
| bonds (Å)                       | 0.006                                                                                              | 0.005                                                                                              | 0.004                                                                                             | 0.005                                                                                              |
| angles (°)                      | 0.845                                                                                              | 0.803                                                                                              | 0.589                                                                                             | 0.764                                                                                              |
| <b>Ramachandran plot</b>        |                                                                                                    |                                                                                                    |                                                                                                   |                                                                                                    |
| favored (%)                     | 98.02                                                                                              | 98.25                                                                                              | 98.87                                                                                             | 99.53                                                                                              |
| allowed (%)                     | 100.00                                                                                             | 100.00                                                                                             | 100.00                                                                                            | 100.00                                                                                             |
| Rotamer outliers (%)            | 0.30                                                                                               | 0.58                                                                                               | 0.27                                                                                              | 0.00                                                                                               |
| Clashscore                      | 13.43                                                                                              | 11.98                                                                                              | 4.02                                                                                              | 7.66                                                                                               |

|                                 | <b>GQ-907</b>                                                                                      | <b>GQ-112</b>                                                                                      | <b>NT-214</b>                                                                                       | <b>NT-391</b>                                                                                     |
|---------------------------------|----------------------------------------------------------------------------------------------------|----------------------------------------------------------------------------------------------------|-----------------------------------------------------------------------------------------------------|---------------------------------------------------------------------------------------------------|
| PDB ID                          | 6YFO                                                                                               | 6YFP                                                                                               | 6YFQ                                                                                                | 6YFR                                                                                              |
| <b>Crystallization</b>          |                                                                                                    |                                                                                                    |                                                                                                     |                                                                                                   |
| Conditions                      | 12.5 % PEG 3350,<br>0.05 M Bis-tris pH 5.5                                                         | 0.615 M sodium<br>succinate pH 7.0                                                                 | 30% MPD, 0.02 M<br>calcium chloride, 0.1<br>M sodium acetate pH<br>4.6                              | 34% MPD, 0.1 M<br>sodium nitrate, 0.1M<br>sodium acetate pH 4.6                                   |
| <b>Data collection</b>          |                                                                                                    |                                                                                                    |                                                                                                     |                                                                                                   |
| Date                            | 2019-01-24                                                                                         | 2019-03-22                                                                                         | 2018-10-19                                                                                          | 2019-01-24                                                                                        |
| Site                            | BESSY II                                                                                           | BESSY II                                                                                           | MAX IV                                                                                              | BESSY II                                                                                          |
| Beamline                        | MX 14.1                                                                                            | MX 14.1                                                                                            | BioMAX                                                                                              | MX 14.1                                                                                           |
| Wavelength (Å)                  | 0.9184                                                                                             | 0.9184                                                                                             | 0.97776                                                                                             | 0.9184                                                                                            |
| <b>Data reduction</b>           |                                                                                                    |                                                                                                    |                                                                                                     |                                                                                                   |
| Space group                     | C 2                                                                                                | C 2                                                                                                | R 3 2                                                                                               | P 1                                                                                               |
| Cell parameters                 | a = 415.01<br>b = 335.00<br>c = 291.78<br>$\alpha$ = 90.00<br>$\beta$ = 134.66<br>$\gamma$ = 90.00 | a = 469.42<br>b = 332.41<br>c = 293.53<br>$\alpha$ = 90.00<br>$\beta$ = 127.87<br>$\gamma$ = 90.00 | a = 341.90<br>b = 341.90<br>c = 1253.60<br>$\alpha$ = 90.00<br>$\beta$ = 90.00<br>$\gamma$ = 120.00 | a = 161.92<br>b = 162.07<br>c = 162.98<br>$\alpha$ = 71.16<br>$\beta$ = 66.67<br>$\gamma$ = 66.83 |
| Total number of observations    | 1226838                                                                                            | 1699944                                                                                            | 5672505                                                                                             | 690098                                                                                            |
| Number of unique reflections    | 353773                                                                                             | 508294                                                                                             | 275564                                                                                              | 294001                                                                                            |
| Resolution (Å)                  | 49.14 - 3.48                                                                                       | 57.21 - 3.10                                                                                       | 49.97 - 3.80                                                                                        | 51.89 - 2.60                                                                                      |
| Highest resolution bin          | 3.69 - 3.48                                                                                        | 3.27 - 3.10                                                                                        | 4.01 - 3.80                                                                                         | 2.74 - 2.60                                                                                       |
| Multiplicity                    | 3.5 (3.5)                                                                                          | 3.3 (2.0)                                                                                          | 20.6 (19.2)                                                                                         | 2.3 (2.1)                                                                                         |
| Completeness (%)                | 97.9 (94.2)                                                                                        | 79.5 (35.7)                                                                                        | 98.3 (90.0)                                                                                         | 69.7 (56.2)                                                                                       |
| R-merge                         | 0.449 (2.461)                                                                                      | 0.310 (1.139)                                                                                      | 0.597 (2.764)                                                                                       | 0.239 (1.134)                                                                                     |
| Mean I/sig(I)                   | 3.2 (0.5)                                                                                          | 3.4 (0.7)                                                                                          | 4.7 (1.0)                                                                                           | 2.5 (0.5)                                                                                         |
| CC(1/2)                         | 0.966 (0.180)                                                                                      | 0.753 (0.254)                                                                                      | 0.993 (0.467)                                                                                       | 0.927 (0.102)                                                                                     |
| Wilson B-factor                 | 83.2                                                                                               | 46.4                                                                                               | 96.6                                                                                                | 46.7                                                                                              |
| <b>Refinement</b>               |                                                                                                    |                                                                                                    |                                                                                                     |                                                                                                   |
| Resolution                      | 49.140 - 3.484                                                                                     | 57.200 - 3.100                                                                                     | 49.955 - 3.800                                                                                      | 51.880 - 2.600                                                                                    |
| Highest resolution bin          | 3.609 - 3.484                                                                                      | 3.211 - 3.100                                                                                      | 3.936 - 3.800                                                                                       | 2.693 - 2.600                                                                                     |
| <b>Number of reflections</b>    |                                                                                                    |                                                                                                    |                                                                                                     |                                                                                                   |
| work set                        | 347398                                                                                             | 502524                                                                                             | 275362                                                                                              | 286598                                                                                            |
| free set                        | 9832                                                                                               | 9844                                                                                               | 4997                                                                                                | 9703                                                                                              |
| R-work                          | 0.2685 (0.3989)                                                                                    | 0.2500 (0.3705)                                                                                    | 0.2199 (0.3775)                                                                                     | 0.3175 (0.4009)                                                                                   |
| R-free                          | 0.2710 (0.3925)                                                                                    | 0.2537 (0.3828)                                                                                    | 0.2220 (0.3979)                                                                                     | 0.3231 (0.3985)                                                                                   |
| <b>Number of atoms</b>          |                                                                                                    |                                                                                                    |                                                                                                     |                                                                                                   |
| protein                         | 87480                                                                                              | 116370                                                                                             | 61200                                                                                               | 56340                                                                                             |
| RNA                             |                                                                                                    |                                                                                                    |                                                                                                     |                                                                                                   |
| water                           |                                                                                                    |                                                                                                    |                                                                                                     |                                                                                                   |
| other                           |                                                                                                    |                                                                                                    |                                                                                                     |                                                                                                   |
| <b>Average B-factor</b>         |                                                                                                    |                                                                                                    |                                                                                                     |                                                                                                   |
| protein                         | 110.95                                                                                             | 43.41                                                                                              | 135.8                                                                                               | 50.25                                                                                             |
| RNA                             |                                                                                                    |                                                                                                    |                                                                                                     |                                                                                                   |
| water                           |                                                                                                    |                                                                                                    |                                                                                                     |                                                                                                   |
| other                           |                                                                                                    |                                                                                                    |                                                                                                     |                                                                                                   |
| <b>rmsd from ideal geometry</b> |                                                                                                    |                                                                                                    |                                                                                                     |                                                                                                   |
| bonds (Å)                       | 0.005                                                                                              | 0.006                                                                                              | 0.007                                                                                               | 0.008                                                                                             |
| angles (°)                      | 0.87                                                                                               | 0.905                                                                                              | 0.817                                                                                               | 0.685                                                                                             |
| <b>Ramachandran plot</b>        |                                                                                                    |                                                                                                    |                                                                                                     |                                                                                                   |
| favored (%)                     | 99.22                                                                                              | 98.97                                                                                              | 98.50                                                                                               | 100.00                                                                                            |
| allowed (%)                     | 100.00                                                                                             | 100.00                                                                                             | 100.00                                                                                              | 100.00                                                                                            |
| Rotamer outliers (%)            | 0.00                                                                                               | 0.00                                                                                               | 0.00                                                                                                | 0.00                                                                                              |
| Clashscore                      | 11.77                                                                                              | 7.84                                                                                               | 12.14                                                                                               | 2.73                                                                                              |

|                                 | PQ-465                                                                         | Wenzhou1                                                                      | Wenzhou4                                                                      |
|---------------------------------|--------------------------------------------------------------------------------|-------------------------------------------------------------------------------|-------------------------------------------------------------------------------|
| PDB ID                          | 6YFS                                                                           | 6YFT                                                                          | 6YFU                                                                          |
| <b>Crystallization</b>          |                                                                                |                                                                               |                                                                               |
| Conditions                      | 38% MPD, 0.1 M sodium acetate pH 4.6                                           | 10 % v/v ethanol, 0.1 M Tris-HCl pH 8.5                                       | 30 % MPD, 0.1 M MES pH 6.5                                                    |
| <b>Data collection</b>          |                                                                                |                                                                               |                                                                               |
| Date                            | 2019-06-08                                                                     | 2019-01-24                                                                    | 2018-10-19                                                                    |
| Site                            | BESSY II                                                                       | BESSY II                                                                      | MAX IV                                                                        |
| Beamline                        | MX 14.1                                                                        | MX 14.1                                                                       | BioMAX                                                                        |
| Wavelength (Å)                  | 0.9184                                                                         | 0.9184                                                                        | 0.97776                                                                       |
| <b>Data reduction</b>           |                                                                                |                                                                               |                                                                               |
| Space group                     | C 2                                                                            | P 1                                                                           | I 2 3                                                                         |
| Cell parameters                 | a = 453.15<br>b = 309.76<br>c = 294.60<br>α = 90.00<br>β = 130.08<br>γ = 90.00 | a = 277.47<br>b = 396.64<br>c = 399.87<br>α = 69.66<br>β = 83.65<br>γ = 83.49 | a = 551.80<br>b = 551.80<br>c = 551.80<br>α = 90.00<br>β = 90.00<br>γ = 90.00 |
| Total number of observations    | 1350175                                                                        | 3182922                                                                       | 9650681                                                                       |
| Number of unique reflections    | 382128                                                                         | 1749831                                                                       | 229056                                                                        |
| Resolution (Å)                  | 49.35 - 3.50                                                                   | 61.16 - 3.50                                                                  | 49.96 - 4.02                                                                  |
| Highest resolution bin          | 3.71 - 3.50                                                                    | 3.69 - 3.50                                                                   | 4.24 - 4.00                                                                   |
| Multiplicity                    | 3.5 (3.5)                                                                      | 1.8 (1.8)                                                                     | 42.1 (40.0)                                                                   |
| Completeness (%)                | 97.5 (96.3)                                                                    | 87.6 (89.9)                                                                   | 98.3 (90.1)                                                                   |
| R-merge                         | 0.473 (4.064)                                                                  | 0.307 (1.481)                                                                 | 0.882 (6.402)                                                                 |
| Mean I/sig(I)                   | 3.5 (0.3)                                                                      | 2.6 (0.5)                                                                     | 5.2 (0.6)                                                                     |
| CC(1/2)                         | 0.970 (0.110)                                                                  | 0.920 (0.117)                                                                 | 0.994 (0.201)                                                                 |
| Wilson B-factor                 | 98.8                                                                           | 71.1                                                                          | 127.6                                                                         |
| <b>Refinement</b>               |                                                                                |                                                                               |                                                                               |
| Resolution                      | 49.343 - 3.498                                                                 | 61.150 - 3.500                                                                | 49.958 - 4.018                                                                |
| Highest resolution bin          | 3.623 - 3.498                                                                  | 3.625 - 3.500                                                                 | 4.162 - 4.018                                                                 |
| <b>Number of reflections</b>    |                                                                                |                                                                               |                                                                               |
| work set                        | 357164                                                                         | 1741933                                                                       | 227552                                                                        |
| free set                        | 9293                                                                           | 19893                                                                         | 4953                                                                          |
| R-work                          | 0.2522 (0.3874)                                                                | 0.2612 (0.3894)                                                               | 0.2424 (0.3710)                                                               |
| R-free                          | 0.2593 (0.3856)                                                                | 0.2606 (0.3897)                                                               | 0.2498 (0.3832)                                                               |
| <b>Number of atoms</b>          |                                                                                |                                                                               |                                                                               |
| protein                         | 84900                                                                          | 302040                                                                        | 66540                                                                         |
| RNA                             |                                                                                | 25200                                                                         |                                                                               |
| water                           |                                                                                |                                                                               |                                                                               |
| other                           |                                                                                |                                                                               |                                                                               |
| <b>Average B-factor</b>         |                                                                                |                                                                               |                                                                               |
| protein                         | 120.8                                                                          | 93.43                                                                         | 161.39                                                                        |
| RNA                             |                                                                                | 186.53                                                                        |                                                                               |
| water                           |                                                                                |                                                                               |                                                                               |
| other                           |                                                                                |                                                                               |                                                                               |
| <b>rmsd from ideal geometry</b> |                                                                                |                                                                               |                                                                               |
| bonds (Å)                       | 0.005                                                                          | 0.008                                                                         | 0.005                                                                         |
| angles (°)                      | 0.755                                                                          | 0.955                                                                         | 0.994                                                                         |
| <b>Ramachandran plot</b>        |                                                                                |                                                                               |                                                                               |
| favored (%)                     | 98.09                                                                          | 98.50                                                                         | 98.61                                                                         |
| allowed (%)                     | 100.00                                                                         | 100.00                                                                        | 100.00                                                                        |
| Rotamer outliers (%)            | 0.00                                                                           | 0.00                                                                          | 0.00                                                                          |
| Clashscore                      | 11.85                                                                          | 4.57                                                                          | 15.19                                                                         |

**Table S2. Crystallographic data collection, reduction and refinement statistics.** Values in parentheses correspond to the highest resolution bin.

## REFERENCES AND NOTES

1. P. Pumpens, *Single-Stranded RNA Phages: From Molecular Biology to Nanotechnology* (CRC Press, 2020).
2. Y. I. Wolf, D. Kazlauskas, J. Iranzo, A. Lucía-Sanz, J. H. Kuhn, M. Krupovic, V. V. Dolja, E. V. Koonin, Origins and evolution of the global RNA virome. *mBio* **9**, e02329-18 (2018).
3. K. Valegård, L. Liljas, K. Fridborg, T. Unge, The three-dimensional structure of the bacterial virus MS2. *Nature* **345**, 36–41 (1990).
4. X. Dai, Z. Li, M. Lai, S. Shu, Y. Du, Z. H. Zhou, R. Sun, In situ structures of the genome and genome-delivery apparatus in a single-stranded RNA virus. *Nature* **541**, 112–116 (2017).
5. L. Liljas, K. Fridborg, K. Valegård, M. Bundule, P. Pumpens, Crystal structure of bacteriophage fr capsids at 3.5 Å resolution. *J. Mol. Biol.* **244**, 279–290 (1994).
6. R. Golmohammadi, K. Fridborg, M. Bundule, K. Valegård, L. Liljas, The crystal structure of bacteriophage Q $\beta$  at 3.5 Å resolution. *Structure* **4**, 543–554 (1996).
7. K. Tars, M. Bundule, K. Fridborg, L. Liljas, The crystal structure of bacteriophage GA and a comparison of bacteriophages belonging to the major groups of *Escherichia coli* leviviruses. *J. Mol. Biol.* **271**, 759–773 (1997).
8. K. Tars, K. Fridborg, M. Bundule, L. Liljas, The three-dimensional structure of bacteriophage PP7 from *Pseudomonas aeruginosa* at 3.7-Å resolution. *Virology* **272**, 331–337 (2000).
9. M. Persson, K. Tars, L. Liljas, The capsid of the small RNA phage PRR1 is stabilized by metal ions. *J. Mol. Biol.* **383**, 914–922 (2008).
10. P. Plevka, A. Kazaks, T. Voronkova, S. Kotelovica, A. Dishlers, L. Liljas, K. Tars, The structure of bacteriophage  $\phi$ Cb5 reveals a role of the RNA genome and metal ions in particle stability and assembly. *J. Mol. Biol.* **391**, 635–647 (2009).

11. M. Shishovs, J. Rumnieks, C. Diebolder, K. Jaudzems, L. B. Andreas, J. Stanek, A. Kazaks, S. Kotelovica, I. Akopjana, G. Pintacuda, R. I. Koning, K. Tars, Structure of AP205 coat protein reveals circular permutation in ssRNA bacteriophages. *J. Mol. Biol.* **428**, 4267–4279 (2016).
12. S. R. Krishnamurthy, A. B. Janowski, G. Zhao, D. Barouch, D. Wang, Hyperexpansion of RNA bacteriophage diversity. *PLoS Biol.* **14**, e1002409 (2016).
13. M. Shi, X.-D. Lin, J.-H. Tian, L.-J. Chen, X. Chen, C.-X. Li, X.-C. Qin, J. Li, J.-P. Cao, J.-S. Eden, J. Buchmann, W. Wang, J. Xu, E.C. Holmes, Y.-Z. Zhang, Redefining the invertebrate RNA virosphere. *Nature* **540**, 539–543 (2016).
14. E. P. Starr, E. E. Nuccio, J. Pett-Ridge, J. F. Banfield, M. K. Firestone, Metatranscriptomic reconstruction reveals RNA viruses with the potential to shape carbon cycling in soil. *Proc. Natl. Acad. Sci. U.S.A.* **116**, 25900–25908 (2019).
15. J. Callanan, S. R. Stockdale, A. Shkoporov, L. A. Draper, R. P. Ross, C. Hill, Expansion of known ssRNA phage genomes: From tens to over a thousand. *Sci. Adv.* **6**, eaay5981 (2020).
16. I. Liekniņa, G. Kalniņš, I. Akopjana, J. Bogans, M. Šišovs, J. Jansons, J. Rūmnieks, K. Tārs, Production and characterization of novel ssRNA bacteriophage virus-like particles from metagenomic sequencing data. *J. Nanobiotech.* **17**, 61 (2019).
17. P. Pumpens, R. Renhofa, A. Dishlers, T. Kozlovska, V. Ose, P. Pushko, K. Tars, E. Grens, M.F. Bachmann, The true story and advantages of RNA phage capsids as nanotools. *Intervirology* **59**, 74–110 (2016).
18. S. C. Harrison, A. J. Olson, C. E. Schutt, F. K. Winkler, G. Bricogne, Tomato bushy stunt virus at 2.9 Å resolution. *Nature* **276**, 368–373 (1978).
19. K. Tars, A. Zeltins, L. Liljas, The three-dimensional structure of cocksfoot mottle virus at 2.7 Å resolution. *Virology* **310**, 287–297 (2003).
20. P. Plevka, K. Tars, A. Zeltins, I. Balke, E. Truve, L. Liljas, The three-dimensional structure of ryegrass mottle virus at 2.9 Å resolution. *Virology* **369**, 364–374 (2007).



21. M. A. Asensio, N. M. Morella, C. M. Jakobson, E. C. Hartman, J. E. Glasgow, B. Sankaran, P. H. Zwart, D. Tullman-Ercek, A selection for assembly reveals that a single amino acid mutant of the bacteriophage MS2 coat protein forms a smaller virus-like particle. *Nano Lett.* **16**, 5944–5950 (2016).
22. A. Luque, D. Reguera, The structure of elongated viral capsids. *Biophys. J.* **98**, 2993–3003 (2010).
23. I. Cielens, V. Ose, I. Petrovskis, A. Strelnikova, R. Renhofa, T. Kozlovska, P. Pumpens, Mutilation of RNA phage Q $\beta$  virus-like particles: From icosahedrons to rods. *FEBS Lett.* **482**, 261–264 (2000).
24. J. Rumnieks, V. Ose, K. Tars, A. Dislers, A. Strods, I. Cielens, R. Renhofa, Assembly of mixed rod-like and spherical particles from group I and II RNA bacteriophage coat proteins. *Virology* **391**, 187–194 (2009).
25. M. F. Moody, The shape of the T-even bacteriophage head. *Virology* **26**, 567–576 (1965).
26. A. Sicard, Y. Michalakakis, S. Gutiérrez, S. Blanc, The strange lifestyle of multipartite viruses. *PLOS Pathog.* **12**, e1005819 (2016).
27. K. Valegård, J. B. Murray, P. G. Stockley, N. J. Stonehouse, L. Liljas, Crystal structure of an RNA bacteriophage coat protein–operator complex. *Nature* **371**, 623–626 (1994).
28. M. Persson, K. Tars, L. Liljas, PRR1 coat protein binding to its RNA translational operator. *Acta Crystallogr. D Biol. Crystallogr.* **69**, 367–372 (2013).
29. J. Rumnieks, K. Tars, Crystal structure of the bacteriophage Q $\beta$  coat protein in complex with the RNA operator of the replicase gene. *J. Mol. Biol.* **426**, 1039–1049 (2014).
30. J. A. Chao, Y. Patskovsky, S. C. Almo, R. H. Singer, Structural basis for the coevolution of a viral RNA–protein complex. *Nat. Struct. Mol. Biol.* **15**, 103–105 (2008).
31. K. V. Gorzelnik, Z. Cui, C. A. Reed, J. Jakana, R. Young, J. Zhang, Asymmetric cryo-EM structure of the canonical *Allolevivirus* Q $\beta$  reveals a single maturation protein and the genomic ssRNA in situ. *Proc. Natl. Acad. Sci. U.S.A.* **113**, 11519–11524 (2016).

32. Ó. Rolfsson, S. Middleton, I. W. Manfield, S. J. White, B. Fan, R. Vaughan, N. A. Ranson, E. Dykeman, R. Twarock, J. Ford, C. C. Kao, P. G. Stockley, Direct evidence for packaging signal-mediated assembly of bacteriophage MS2. *J. Mol. Biol.* **428**, 431–448 (2016).
33. D. J. Klein, P. B. Moore, T. A. Steitz, The roles of ribosomal proteins in the structure assembly, and evolution of the large ribosomal subunit. *J. Mol. Biol.* **340**, 141–177 (2004).
34. A. L. N. Rao, Genome packaging by spherical plant RNA viruses. *Annu. Rev. Phytopathol.* **44**, 61–87 (2006).
35. M. Krupovic, E. V. Koonin, Multiple origins of viral capsid proteins from cellular ancestors. *Proc. Natl. Acad. Sci. U.S.A.* **114**, E2401–E2410 (2017).
36. T. G. G. Battye, L. Kontogiannis, O. Johnson, H. R. Powell, A. G. W. Leslie, *iMOSFLM*: A new graphical interface for diffraction-image processing with *MOSFLM*. *Acta Crystallogr. D Biol. Crystallogr.* **67**, 271–281 (2011).
37. P. R. Evans, Scala. Joint CCP4 + ESF-EAMCB. *Newslett. Protein Crystallogr.* **33**, 22–24 (1997).
38. M. D. Winn, C. C. Ballard, K. D. Cowtan, E. J. Dodson, P. Emsley, P. R. Evans, R. M. Keegan, E. B. Krissinel, A. G. W. Leslie, A. McCoy, S. J. McNicholas, G. N. Murshudov, N. S. Pannu, E. A. Potterton, H. R. Powell, R. J. Read, A. Vagin, K. S. Wilson, Overview of the *CCP4* suite and current developments. *Acta Crystallogr. D Biol. Crystallogr.* **67**, 235–242 (2011).
39. W. Kabsch, XDS. *Acta Crystallogr. D Biol. Crystallogr.* **66**, 125–132 (2010).
40. K. M. Sparta, M. Krug, U. Heinemann, U. Mueller, M. S. Weiss, XDSAPP2.0. *J. Appl. Crystallogr.* **49**, 1085–1092 (2016).
41. L. Tong, M. G. Rossmann, Rotation function calculations with GLRF program. *Methods Enzymol.* **276**, 594–611 (1997).
42. A. J. McCoy, R. W. Grosse-Kunstleve, P. D. Adams, M. D. Winn, L. C. Storoni, R. J. Read, *Phaser* crystallographic software. *J. Appl. Cryst.* **40**, 658–674 (2007).

43. G. J. Kleywegt, T. A. Jones, Halloween ... masks and bones in *From First Map to Final model. Proceedings of the CCP4 Study Weekend*, S. Bailey, R. Hubbard, D. Waller, Eds. (SERC Daresbury Laboratory, Daresbury, 1994), pp. 59–66.
44. R. J. Read, Improved Fourier coefficients for maps using phases from partial structures with errors. *Acta Crystallogr. A* **42**, 140–149 (1986).
45. G. J. Kleywegt, R. J. Read, Not your average density. *Structure* **5**, 1557–1569 (1997).
46. P. Emsley, K. Cowtan, *Coot*: Model-building tools for molecular graphics. *Acta Crystallogr. D Biol. Crystallogr.* **60**, 2126–2132 (2004).
47. D. Liebschner, P. V. Afonine, M. L. Baker, G. Bunkóczi, V. B. Chen, T. I. Croll, B. Hintze, L. W. Hung, S. Jain, A. J. McCoy, N. W. Moriarty, R. D. Oeffner, B. K. Poon, M. G. Prisant, R. J. Read, J. S. Richardson, D. C. Richardson, M. D. Sammito, O. V. Sobolev, D. H. Stockwell, T. C. Terwilliger, A. G. Urzhumtsev, L. L. Videau, C. J. Williams, P. D. Adams, Macromolecular structure determination using X-rays, neutrons and electrons: Recent developments in *Phenix*. *Acta Crystallogr. D Struct. Biol.* **75**, 861–877 (2019).
48. V. B. Chen, W. B. Arendall III, J. J. Headd, D. A. Keedy, R. M. Immormino, G. J. Kapral, L. W. Murray, J. S. Richardson, D. C. Richardson, *MolProbity*: All-atom structure validation for macromolecular crystallography. *Acta Crystallogr. D Biol. Crystallogr.* **66**, 12–21 (2010).
49. E. Krissinel, K. Henrick, Secondary-structure matching (SSM), a new tool for fast protein structure alignment in three dimensions. *Acta Crystallogr. D Biol. Crystallogr.* **60**, 2256–2268 (2004).
50. L. Holm, Benchmarking fold detection by DaliLite v.5. *Bioinformatics* **35**, 5326–5327 (2019).
51. E. Krissinel, K. Henrick, Inference of macromolecular assemblies from crystalline state. *J. Mol. Biol.* **372**, 774–797 (2007).
